# Supplementary material for: Temperature impacts the bovine ex vivo immune response towards Mycoplasmopsis bovis
Source: Springer Nature journal article supplement (doi:10.1186/s13567-024-01272-3), 2024-02-13
Supplement: 13567_2024_1272_MOESM1_ESM.pdf [file 13567_2024_1272_MOESM1_ESM.pdf]

| Animal | Location  | Breed             | ID             | Age (years) | Sex    |
|--------|-----------|-------------------|----------------|-------------|--------|
| ●      | Agroscope | <i>Bos taurus</i> | CH120150276437 | 2           | Female |
| ■      | Agroscope | <i>Bos taurus</i> | CH120150276420 | 2           | Female |
| ▲      | Agroscope | <i>Bos taurus</i> | CH120150276581 | 1           | Female |
| ◆      | Agroscope | <i>Bos taurus</i> | CH120150276451 | 2           | Female |
| ●      | Agroscope | <i>Bos taurus</i> | CH120150276444 | 2           | Female |
| ▼      | Agroscope | <i>Bos taurus</i> | CH120150276499 | 1           | Female |
| ●      | Agroscope | <i>Bos taurus</i> | CH120150276482 | 1           | Female |
| ■      | Agroscope | <i>Bos taurus</i> | CH120150276475 | 1           | Female |
| ▲      | Agroscope | <i>Bos taurus</i> | CH120150276550 | 1           | Female |
| ▼      | Agroscope | <i>Bos taurus</i> | CH120150276567 | 1           | Female |
| ▲      | Agroscope | <i>Bos taurus</i> | CH120150276512 | 1           | Female |
| ▼      | Agroscope | <i>Bos taurus</i> | CH120158564574 | 1           | Female |
| ●      | Agroscope | <i>Bos taurus</i> | CH120150276574 | 1           | Female |
| ■      | Agroscope | <i>Bos taurus</i> | CH120150276635 | 1           | Female |
| ○      | Agroscope | <i>Bos taurus</i> | CH120150276628 | 1           | Female |
| □      | Agroscope | <i>Bos taurus</i> | CH120158564628 | 1           | Female |
| ●      | Agroscope | <i>Bos taurus</i> | CH120150276505 | 2           | Female |
| ■      | Agroscope | <i>Bos taurus</i> | CH120150276611 | 2           | Female |
| ▼      | Agroscope | <i>Bos taurus</i> | CH120150276543 | 2           | Female |
| ▲      | Agroscope | <i>Bos taurus</i> | CH120150276529 | 2           | Female |
| ▲      | Agroscope | <i>Bos taurus</i> | CH120150276581 | 1           | Female |
| ▼      | Agroscope | <i>Bos taurus</i> | CH120150276468 | 2           | Female |
