# Supplementary material for: Temperature impacts the bovine ex vivo immune response towards Mycoplasmopsis bovis
Source: Springer Nature journal article supplement (doi:10.1186/s13567-024-01272-3), 2024-02-13
Supplement: 13567_2024_1272_MOESM2_ESM.pdf [file 13567_2024_1272_MOESM2_ESM.pdf]

A

## Raw data

|   | 1       | 2       | 3        | 4       | 5       | 6       | 7       | 8       |
|---|---------|---------|----------|---------|---------|---------|---------|---------|
| A | 0.066   | 0.065   | 0.104    | 0.057   | 0.082   | 0.057   | 0.07    | 0.071   |
| B | 0.039   | 0.092 ▲ | 0.09 ●   | 0.059 ▲ | 0.086 ▲ | 0.06 ▲  | 0.073 ■ | 0.073 ▼ |
| C | 1.276   | 0.066   | 0.079    | 0.085   | 0.063   | 0.29    | 0.092   | 0.071   |
| D | 1.154   | 0.063 ◆ | 0.1198 ■ | 0.092 ▼ | 0.049 ▼ | 0.078 ▲ | 0.099 ▲ | 0.078 ▲ |
| E | 0.082   | 0.111   | 0.158    | 0.082   | 0.228   | 0.084   | 0.114   | 0.085   |
| F | 0.057 ● | 0.085 ● | 0.12 ●   | 0.108 ○ | 0.073 ■ | 0.079 ▼ | 0.079 ▼ | 0.069 ▼ |
| G | 0.047   | 0.066   | 0.049    | 0.055   | 0.059   | 0.091   | 0.093   |         |
| H | 0.055 ■ | 0.083 ▼ | 0.046 ■  | 0.043 ■ | 0.058 ▼ | 0.076 ▼ | 0.07 ▲  |         |

B

## Analysed data

|   | 1      | 2     | 3      | 4      | 5     | 6      | 7     | 8     |
|---|--------|-------|--------|--------|-------|--------|-------|-------|
| A |        |       |        |        |       |        |       |       |
| B | 0.0    | 2.2 ▲ | 3.8 ●  | 0.5 ▲  | 2.7 ▲ | 0.5 ▲  | 1.6 ■ | 1.7 ▼ |
| C |        |       |        |        |       |        |       |       |
| D | 100.0  | 1.0 ◆ | 4.0 ■  | 3.1 ▼  | 0.3 ▼ | 11.3 ▲ | 3.7 ▲ | 1.9 ▲ |
| E |        |       |        |        |       |        |       |       |
| F | 1.5 ●  | 3.9 ● | 7.4 ●  | 3.7 ○  | 8.4 ■ | 2.5 ▼  | 3.8 ▼ | 2.1 ▼ |
| G |        |       |        |        |       |        |       |       |
| H | -0.1 ■ | 1.9 ▼ | -0.4 ■ | -0.3 ■ | 0.5 ▼ | 2.7 ▼  | 2.5 ▲ |       |
